1 **Patterns of acquired HIV-1 drug resistance mutations and predictors of virological**  
2 **failure in Moshi, northern Tanzania**

3 Shabani Ramadhani Mziray<sup>1,2\*</sup>, Happiness H Kumburu<sup>3</sup>, Hellen B Assey<sup>2</sup>, Tolbert B Sonda<sup>3</sup>,  
4 Michael J Mahande<sup>4</sup>, Sia E Msuya<sup>4,5</sup>, Ireen E Kiwelu<sup>2,3</sup>

5

6 <sup>1</sup>Department of Biochemistry and Molecular Biology, Kilimanjaro Christian Medical  
7 University College (KCMUCo), Moshi, Kilimanjaro, Tanzania

8 <sup>2</sup>Department of Medical Laboratory, Kibong'oto Infectious Diseases Hospital (KIDH), Siha,  
9 Kilimanjaro, Tanzania

10 <sup>3</sup>Kilimanjaro Clinical Research Institute (KCRI), Moshi, Kilimanjaro, Tanzania

11 <sup>4</sup>Department of Epidemiology and Biostatistics, Institute of Public Health, Kilimanjaro  
12 Christian Medical University College (KCMUCo), Moshi, Kilimanjaro, Tanzania

13 <sup>5</sup>Department of Community Health, Institute of Public Health, Kilimanjaro Christian Medical  
14 University College (KCMUCo), Moshi, Kilimanjaro, Tanzania

15

16 \*Corresponding author

17 E-mail: [s.r.mziray@gmail.com](mailto:s.r.mziray@gmail.com) (SRM)

18

19

20

21

22

23

24

25

26

## 27 **Abstract**

28 Drug resistance is a public health concern. Profiles of HIV drug resistance mutations  
29 (HIVDRM) and virological failure (VF) are not extensively studied in Tanzania. This study  
30 aimed to determine HIVDRM and predictors of VF in HIV-infected individuals failing first-  
31 line HIV drugs in Moshi, northern Tanzania. A case-control study was conducted at KCMC,  
32 Mawenzi, Pasua and Majengo health facilities with HIV-care and treatment clinics in Moshi  
33 from October, 2017 to August, 2018. Cases and controls were HIV-infected individuals with  
34 VF and viral suppression (VS) respectively. HIV-1 reverse transcriptase and protease genes  
35 were amplified and sequenced. Stanford University's HIV drug resistance database and  
36 REGA HIV-1 Subtyping tool 3.0 determined HIVDRM and HIV-1 subtypes respectively.  
37 Odds ratios with 95% confidence intervals investigated predictors of VF. P-value <5% was  
38 considered statistically significant. A total of 124 participants were recruited, of whom 63  
39 (50.8%) had VF and 61 (49.2%) had VS. Majority (66.1%) were females. Median [IQR] age  
40 and duration on ART were 45 [35-52] years and 72 [48-104] months respectively. Twenty  
41 five out of 26 selected HIV-1 RNA samples from cases were successively sequenced. Twenty  
42 four samples (96%) had at least one major mutation conferring resistance to HIV drugs, with  
43 non-nucleoside reverse transcriptase inhibitor (NNRTI) associated mutations as the majority  
44 (92%). Frequent NNRTI resistance mutations were K103N (n=11), V106M (n=5) and G190A  
45 (n=5). Prevalent nucleoside reverse transcriptase inhibitors mutations were M184V (n=17),  
46 K70R (n=7) and D67N (n=6). Dual-class resistance was observed in 16 (64%) samples.  
47 Thirteen samples (52%) had at least one thymidine analogue-associated resistance mutation  
48 (TAM). Three samples (12%) had T69D mutation with at least 1 TAM. Age was  
49 independently associated with VF [aOR 0.94 (0.90-0.97) p<0.001]. In conclusion, HIV drug  
50 resistance is common among people failing antiretroviral therapy and resistance testing will  
51 help to guide switching of HIV drugs.

## 52 **Introduction**

53           Human Immunodeficiency Virus (HIV) infection is still a public health problem with  
54 an estimation of 37.9 million people living with it worldwide by the end of 2018. Among the  
55 people living with HIV (PLHIV) globally, 36.2 million are adults, 1.7 million are children  
56 below 15 years and 18.8 million are women aged 15 years and above. Every day, 5000  
57 people are infected with HIV globally, and more than a half of these new infections occur in  
58 sub-Saharan Africa (sSA). Eastern and Southern Africa alone harbours more than a half of  
59 the world burden of HIV-infections with 20.6 million of PLHIV by the year 2018 [1]. The  
60 incidence-prevalence ratio (IPR) of the worldwide HIV-infection has declined considerably  
61 from 11.2% in 2000 to 4.6% in 2018. In the same year, sSA was also observing a decline in  
62 HIV-infection IPR to about 3.9% and 5.5% in Eastern and Southern Africa; and Western and  
63 Central Africa respectively. Despite the decline in IPR, HIV-infection is still a public health  
64 problem in sSA due to unacceptably high number of PLHIV in this setting (approximately  
65 68% of the global burden) with substantial new HIV-infections [1].

66           Introduction of highly active antiretroviral therapy (HAART) in sSA countries  
67 including Tanzania has significantly helped to reduce HIV/AIDS related mortality from  
68 around 900,000 in 2010 to 470,000 in 2018 [1] with improved quality of life [2]. The globe  
69 further committed that by the year 2020, 90% of PLHIV should know their HIV status, 90%  
70 of PLHIV who know their HIV status should be on ART, and also 90% of PLHIV on ART  
71 should enjoy the sustainable viral suppression, this is alias known as 90-90-90 target [3]. In  
72 the race to achieve the second UNAIDS ‘90’ target, about 51% of PLHIV are on HAART in  
73 Western and Central Africa (WCA); and 67% in Eastern and Southern Africa (ESA)  
74 respectively. The proportions of HIV-infected individuals on treatment with an enjoyment of  
75 viral suppression is better in WCA (79%) compared to ESA (58%) respectively, however, the

76 numbers are below the third UNAIDS ‘90’ target [1]. One of the key challenges which partly  
77 explain the failure to achieve the third UNAIDS ‘90’ in sSA is the emergence of HIV drug  
78 resistance (HIVDR).

79 HIVDR is defined by World Health Organisation (WHO) as presence of one or more  
80 mutations in HIV drug targeted genes that compromise the ability of a specific drug or  
81 combination of drugs to block replication of HIV [4]. HIVDR reverses the gains of HAART  
82 in HIV-infected individuals on treatment for at least 6 months. HIV-infected individuals on  
83 failed first-line HAART regimens are reported to have 50 to 97% of non-nucleoside reverse  
84 transcriptase inhibitors (NNRTI) resistance world-wide [4]. In sSA, more than 80% of HIV-  
85 infected individuals with VF on first-line HAART have HIV-drug resistance [5]. In addition,  
86 sSA has been reported to accommodate tenofovir resistance in more than a half of people  
87 with first-line HAART failure on tenofovir-based regimens. Cytosine analogue resistance  
88 was also highly evident in sSA as compared to Western Europe. Eastern Africa was more  
89 commonly reported to have lamivudine and emtricitabine resistance than NNRTI resistance  
90 [6].

91 Tanzania introduced antiretroviral therapy (ART) program in 2004. As of 2016, the  
92 total number of people on ART was 839,544, and the current recommended first-line  
93 HAART for adults and adolescents is tenofovir + lamivudine + dolutegravir. In case of first-  
94 line HAART failure, the recommended second-line HAART for adults and adolescents is  
95 zidovudine/lamivudine + ritonavir-boosted atazanavir or tenofovir/emtricitabine + ritonavir-  
96 boosted atazanavir [7]. In Tanzania, the markers for treatment failure are based on  
97 immunological, clinical and WHO recommended virological criteria [8]. Clinical and  
98 immunological criteria were extensively described to be less sensitive and less effective [9]  
99 and may reduce early notifications of VF. Tanzania continues to scale up HIV viral load

100 (HVL) testing which is currently done at few selected settings. Of more public health  
101 importance is that HIV-infected individuals confirmed to have VF are switched to second-  
102 line HAART without programmatic HIV drug resistance testing and monitoring, a practice  
103 which may transfer cross-resistance patterns to newly switched drugs and limit the choices  
104 for few available treatment options.

105         Recently, few studies in Tanzania have reported a wide range of first-line HIV drug  
106 resistance mutations (HIVDRMs) including the thymidine analogue associated mutations  
107 which compromise susceptibility to multi-NRTIs [10–12]. In order to complement the efforts  
108 to unearth the burden of HIVDR and preserve the integrity of limited second-line HIV drugs  
109 in Tanzania, this study aimed to test genotypically for drug resistance in the reverse  
110 transcriptase (RT) and protease genes from individual with VF on first-line HAART in Moshi  
111 municipality, northern Tanzania. The study also explored the independent predictions for VF.

## 112 **Materials and methods**

### 113 **Study design and settings**

114         Between October, 2017 and August, 2018, unmatched case-control study was done in  
115 four HIV/AIDS care and treatment clinics (CTC) in Moshi municipality, situated in  
116 Kilimanjaro region, northern Tanzania. Moshi municipality is one of the seven districts of  
117 Kilimanjaro region. The municipality has a total of 18 health facilities with CTC. Four out of  
118 18 CTCs with high client volume were purposively selected to participate in the study. The  
119 CTCs included were that of Kilimanjaro Christian Medical Centre (KCMC), Mawenzi  
120 regional referral hospital, Majengo and Pasua health centres. KCMC provides tertiary care  
121 hospital services to around 6.8 million people living in the northern zone of Tanzania (Tanga,  
122 Kilimanjaro, Arusha and Manyara) and other referrals from nearby settings. Mawenzi

123 regional referral hospital provides referral medical services to around 1.6 million people in  
124 Kilimanjaro region.

125 At the time of recruitment of study participants, the management of HIV-infected  
126 individuals was done in-line with national guidelines for management of HIV and AIDS of  
127 2017 [8]. The CTCs routinely provided HIV counselling and testing services, ART care and  
128 treatment, treatment monitoring, laboratory investigations and treatment adherence support to  
129 HIV-infected individuals. The recommended first-line HAART for adults and adolescents at  
130 the time of the study was tenofovir + lamivudine + efavirenz (TLE), given as a single dose  
131 formulation. Prescriptions of antiretroviral drugs were done by clinicians and to some points  
132 by trained nurses in the health centres. HVL testing was routinely done to all HIV-infected  
133 individuals who have been on ART for at least 6 months. Those found with HVL > 1,000  
134 copies/ml were offered enhanced adherence counselling (EAC) by trained health care  
135 providers. EAC was provided on monthly bases for three months at the CTCs. After 3 months  
136 of EAC, retesting of HVL was done and HIV-infected individuals found still to have HVL >  
137 1,000 copies/ml were classified as having VF and followed by further actions to change their  
138 regimens to second-line. The clinic visits for adolescents and youths were scheduled at  
139 different times from adults to maximize adherence counselling and support. Adherence level  
140 of  $\geq 95\%$  and  $< 95\%$  was regarded as good and poor respectively [8].

## 141 **Study population**

142 The study population was HIV-infected individuals attending the selected CTCs for  
143 routine care and were on first-line HAART treatment for a year or more. HIV-infected  
144 individuals with VF and viral suppression (VS) were included into study as cases and  
145 controls respectively. The cases were defined as HIV-infected individuals with >1000  
146 copies/ml of HIV plasma RNA confirmed by <0.5 logarithmic difference between initial and

147 second HVL with EAC in between. Controls were the HIV-infected individuals attending the  
148 same CTCs along with cases but they have viral suppression (HVL < 1000 copies/ml). The  
149 cases found to have less than three EAC were excluded from the study. The study further  
150 excluded the cases with significant difference HVL measured at the date of interview and that  
151 measured before starting EAC (HIV-1 plasma RNA viral log<sub>10</sub> drop greater than 0.5 at three  
152 month interval with 3 EAC in between).

153

## 154 **Sample size determination**

155 We assumed that the study had 80% power and the proportion exposed in the control  
156 group was 20%. With equal number of cases and controls (ratio of 1:1), we could manage to  
157 detect odds ratio (OR) of 3.0 or greater with the following sample size calculation as  
158 described by Charan and Biswas [13].

159

$$160 \quad n = \left(\frac{r+1}{r}\right) \frac{(\bar{p})(1-\bar{p})(Z_{\beta} + Z_{\alpha/2})^2}{(p_1 - p_2)^2}$$

161

162  $n$  = sample size in each group,  $r$  = ratio of controls to cases,  $\bar{p}$  = a measure of variability  
163 (average proportion exposed),  $p_1$  = proportion exposed in cases,  $p_2$  = proportion exposed in  
164 controls,  $p_1 - p_2$  = Effect size (the difference in proportions),  $Z_{\alpha/2}$  = level of two-tailed  
165 statistical significance,  $Z_{\beta}$  = standard normal variate for power of the study. Our study power  
166 was 80%,  $Z_{\beta} = 0.84$ ; Level of significance was 0.05,  $Z_{\alpha} = 1.96$ ;  $r = 1$  (equal number of cases  
167 and controls),  $OR = 3.0$  and  $p_2 = 20\%$  or 0.2.

$$168 \quad p_1 = \frac{OR \times p_2}{p_2(OR - 1) + 1} = \frac{3.0 \times 0.2}{0.2(3.0 - 1) + 1} = 0.43$$

169

$$\bar{p} = \frac{(p_1 + p_2)}{2} = \frac{(0.43 + 0.2)}{2} = 0.31$$

171

$$\therefore n = \frac{2 \times (0.31) \times (1 - 0.31) \times (0.84 + 1.96)^2}{(0.43 - 0.2)^2} = 63$$

173

174 Therefore, the study planned to recruit 63 study participants with first-line VF and 63 with  
175 VS making a total sample size of 126.

176

## 177 **Enrolment and study procedures**

178 Study participants who met the inclusion criteria and consented to participate were  
179 interviewed to collect demographic and clinical information. After the interviews, 8-10 ml of  
180 EDTA whole blood was collected and centrifuged at 2200 revolutions per minute for 10  
181 minutes with brake-offs to separate plasma from buffy coat and red blood cells within 4 hours  
182 post-collection. HVL was enumerated in-vitro from plasma by reverse transcription-  
183 polymerase chain reaction as per Abbott m2000rt system and was expressed in copies/ml of  
184 plasma.

185 Due to financial constraints, 26 out of 63 samples of cases were selected for  
186 sequencing. Selection was based on having HVL  $\geq$  14,000 copies/ml. Plasma HIV-1 RNA  
187 was extracted using PureLink® Viral RNA/DNA Mini Kit (Invitrogen, Thermo Fisher  
188 Scientific, USA) as per manufacturer's instructions. RT and protease genes of the extracted  
189 HIV-1 RNA was reversely transcribed into complementary DNA (cDNA) and subsequently  
190 subjected into nested polymerase chain reactions (PCR) according to manufacturer's



191 instructions prescribed in HIV-1 genotyping kit: Amplification module (Applied Biosystems,  
192 Life Technologies, Warrington, UK). The amplified cDNA was purified using ExoSAP-IT™  
193 PCR product clean-up reagent (Applied Biosystems, Thermo Fischer Scientific, Inc.).  
194 Reactions were performed using HIV-1 genotyping kit: Cycle sequencing module (Applied  
195 Biosystems, Life Technologies, Warrington, UK) based on Sanger sequencing method using  
196 BigDye™ Terminator v3.1 cycle sequencing kit (Applied Biosystems, Thermo Fischer  
197 Scientific, Inc.). Sequencing was done using 3500xl genetic analyzer (Applied Biosystems)  
198 with a 24 capillary 50 cm array. The study profile was described in Fig 1.

## 199 **Fig 1. Study profile**

200

## 201 **Data analysis**

### 202 **Sequence data analysis**

203 The raw sequence data were assembled, aligned and edited using automated base  
204 calling software, RECall, available at (<http://pssm.cfenet.ubc.ca>) to generate individual  
205 consensus sequences. The sequence data were submitted to GenBank and obtained accession  
206 numbers MT347616 – MT347640. HIVDRMs were analysed using HIV drug resistance  
207 database of Stanford University available at  
208 ([http://hivdb.stanford.edu/pages/alg/sierra\\_sequence.html](http://hivdb.stanford.edu/pages/alg/sierra_sequence.html)) and HIVDRM mutation list from  
209 2019 updates of drug resistance (AIDS Society). To get HIV-1 subtypes, generated consensus  
210 sequences were analysed using REGA HIV-1 Subtyping tool 3.0 available at  
211 (<http://dbpartners.stanford.edu:8080/RegaSubtyping/stanford-hiv/typingtool/>). REGA  
212 confirmed a subtype after clustering with a pure subtype in a database by > 800 base pairs  
213 with a bootstrap confidence of more than 70% in absence of recombination in the boot scan.

214

## 215 **Statistical analysis**

216 Data analysis was performed using STATA version 14.0 (College Station, Texas  
217 77845-4512, USA). Categorical variables were summarized using frequency and proportion  
218 while mean or median with their respective measure of dispersion were used to summarize  
219 numerical variables. A Chi-square test was used to compare the differences in proportions  
220 between groups. Odds ratios (OR) and 95% confidence interval (CI) for predictors of  
221 virological failure were estimated using multivariable logistic regression model. A p-value  
222 <0.05 (2 tails) was considered statistically significant.

223

## 224 **Ethics Consideration**

225 The study was approved by the Kilimanjaro Christian Medical Research Ethics  
226 Review Committee in 2017 with ethical clearance certificate number 2028. Approvals to  
227 conduct the study were further granted by respective authorities in four study sites. Patient  
228 information sheet was given to every potential study participant to ensure informed  
229 consenting process before and after commencement of the study, potential participants  
230 discussed it with the researcher. The sheet explained in detail the aim of the study, purpose,  
231 confidentiality, benefits, unconditional withdrawal from the study and risks of taking part into  
232 the study. Every study participant consented/assented in writing to take part in the study. The  
233 HIV drug resistance testing results were shared with the respective CTCs for further  
234 management of the HIV-infected individuals.

235

236

237

238

239

## 240 Results

### 241 Demographic characteristics of study participants

242 A total of 124 study participants were recruited in this study. Out of the 124, 63  
 243 (50.8%) of study participants had virological failure and 61 (49.2%) had viral suppression.  
 244 The age of the 124 participants ranged from 15 to 79 years, with median [IQR] age of 45 [35-  
 245 52] years. Of the 124; 82 (66.1%) were females and 89 (71.8%) were employed in either  
 246 formal or informal sector (Table 1).

247

**Table 1. Demographic characteristics of study participants (N=124)**

| Characteristic                | Overall    | VF         | VS         |
|-------------------------------|------------|------------|------------|
|                               | n (%)      | n (%)      | n (%)      |
| Age (years)                   |            |            |            |
| 15-34                         | 29 (23.4)  | 26 (41.3)  | 3 (4.9)    |
| ≥35                           | 95 (76.6)  | 37 (58.7)  | 58 (95.1)  |
| Median age [IQR] <sup>a</sup> | 45 [35-52] | 41 [21-49] | 48 [43-54] |
| Sex                           |            |            |            |
| Male                          | 42 (33.9)  | 26 (41.3)  | 16 (26.2)  |
| Female                        | 82 (66.1)  | 37 (58.7)  | 45 (73.8)  |
| Education level               |            |            |            |
| Primary or none               | 84 (67.7)  | 36 (57.2)  | 48 (78.7)  |
| Secondary and above           | 40 (32.3)  | 27 (42.8)  | 13 (21.3)  |
| Marital status                |            |            |            |
| Married/cohabiting            | 40 (32.3)  | 18 (28.6)  | 22 (36.1)  |
| Single                        | 84 (67.7)  | 45 (71.4)  | 39(63.9)   |
| Occupation                    |            |            |            |
| Employed                      | 89 (71.8)  | 36 (57.1)  | 53 (86.9)  |
| Unemployed                    | 35 (28.2)  | 27 (42.9)  | 8 (13.1)   |
| CTC enrolled                  |            |            |            |
| KCMC                          | 53 (42.7)  | 38 (60.3)  | 15 (24.6)  |
| Majengo HC                    | 19 (15.3)  | 7 (11.1)   | 12 (19.7)  |
| Mawenzi RRH                   | 29 (23.4)  | 14 (22.2)  | 15 (24.6)  |
| Pasua HC                      | 23 (18.6)  | 4 (6.4)    | 19 (31.1)  |

VF = Virological failure, VS = Viral suppression; a = Expressed as median [Interquartile range]

## 248 **Clinical characteristics of study participants**

249 The median [IQR] time on ART for the 124 participants was 72 [IQR 48 - 104]  
 250 months, 92 (74.0%) had good adherence, 65 (52.4%) were in non-tenofovir based HAART  
 251 and 66 (53.2%) were in WHO clinical stage III/IV (Table 2). The median CD4 count  
 252 (cells/ $\mu$ L) at follow up was higher in VS participants 518 [IQR: 326-741] than in VF group  
 253 334 [IQR: 134-549]. Likewise 100% of VS participants reported good adherence to ART  
 254 compared to 49% of VF participants (Table 2).

255 **Table 2. Clinical characteristics of the participants (N = 124)**

| Characteristic                                                  | Overall<br>n(%) | VF<br>n(%)       | VS<br>n(%)       |
|-----------------------------------------------------------------|-----------------|------------------|------------------|
| Duration of ART intake (months)                                 |                 |                  |                  |
| 12 – 36                                                         | 20 (16.1)       | 7 (11.1)         | 13 (21.3)        |
| >36                                                             | 104 (83.9)      | 56 (88.9)        | 48 (78.7)        |
| Median [IQR]                                                    | 72 [48-104]     | 84 [60-120]      | 72 [48-96]       |
| Adherence status                                                |                 |                  |                  |
| Good                                                            | 92 (74.2)       | 31 (49.2)        | 61 (100.0)       |
| Poor                                                            | 32 (25.8)       | 32 (50.8)        | 0 (0.0)          |
| Ever switched ART                                               |                 |                  |                  |
| Yes                                                             | 54 (43.5)       | 30 (47.6)        | 24 (39.3)        |
| No                                                              | 70 (56.5)       | 33 (52.4)        | 37 (60.7)        |
| HAART initiated                                                 |                 |                  |                  |
| TDF based                                                       | 39 (31.5)       | 12 (19)          | 27 (44.3)        |
| None TDF based                                                  | 85 (68.5)       | 51 (81)          | 34 (55.7)        |
| HAART on use                                                    |                 |                  |                  |
| TDF based                                                       | 59 (47.6)       | 22 (34.9)        | 37 (60.7)        |
| Non TDF based                                                   | 65 (52.4)       | 41 (65.1)        | 24 (39.3)        |
| Baseline CD4 count (cells/ $\mu$ L)                             |                 |                  |                  |
| <100                                                            | 37 (29.8)       | 17 (27)          | 20 (32.8)        |
| $\geq$ 100                                                      | 87 (70.2)       | 46 (73)          | 41 (67.2)        |
| Median CD4 count [IQR]                                          | 173 [72-276]    | 179 [68-256]     | 169 [73-282]     |
| Follow up CD4 count (cells/ $\mu$ L)                            |                 |                  |                  |
| <100                                                            | 13 (10.5)       | 12 (19)          | 20 (32.8)        |
| $\geq$ 100                                                      | 111 (89.5)      | 51(81)           | 41 (67.2)        |
| Median [IQR]                                                    | 444[215-628]    | 334 [134-549]    | 518 [326-741]    |
| WHO clinical stage                                              |                 |                  |                  |
| I/II                                                            | 58 (46.8)       | 26 (41.3)        | 32 (52.5)        |
| III/IV                                                          | 66 (53.2)       | 37 (58.7)        | 29 (47.5)        |
| Time from HIV diagnosis to ART initiation (months) <sup>a</sup> |                 | 3.5 [1.4 – 17.9] | 2.6 [0.9 – 14.0] |

**TDF=** Tenofovir Disoproxil Fumarate, **VF=** Virological failure **VS=** Viral suppression; **a=** Expressed as median [Interquartile range]

256 **Profiles of acquired HIV drug resistance in RT and protease**  
257 **genes**

258 Genotyping of RT and protease genes of HIV-1 was successful on 25 out of 26  
259 selected samples from participants with VF. Of the 25, almost all (n=24) had at least one  
260 major mutation conferring resistance to HIV drug (Table 3). Out of 25, 23 (92%) samples had  
261 at least one non-nucleoside reverse transcriptase inhibitor (NNRTI) resistance associated  
262 mutations (Fig 2). The most frequent NNRTI mutations were K103N (44%), V106M (20%),  
263 and G190A (20%) (Fig 2), all of these three mutations confer high level resistance to  
264 efavirenz and nevirapine.

265 **Fig 2. Profiles of NNRTI resistance mutations in participants with virological failure**

266

267 In addition, 17 samples (68%) had at least one mutation associated with nucleoside  
268 reverse transcriptase inhibitors (NRTI) resistance. The most frequent NRTI mutations were  
269 M184V (68%), K70R (28%), and D67N (24%) (Fig 3). M184V mutation was associated with  
270 high level resistance to emtricitabine, and lamivudine; while K70R and D67N are among  
271 thymidine analogue-associated resistance mutations (TAM) reducing the susceptibility of all  
272 current NRTI on use.

273 **Fig 3. Profiles of NRTI resistance mutations in participants with virological failure**

274

275

276

277

## 278 **Characteristics of successfully genotyped samples**

279           The characteristics of successfully genotyped samples have been displayed in Table 3.  
280   Dual class resistance was observed in 16 (64%) samples. In general, thirteen samples (52%)  
281   had at least one TAM while three samples (12%) had T69D mutation together with at least 1  
282   TAM. Identified TAMs were T215YF (n=9), K219QE (n=7), K70R (n=7), D67N (n=6),  
283   M41L (n=4), and L210W (n=3). Presence of T69D mutation along with at least 1 TAM  
284   reduces the susceptibility of all currently NRTIs on use. Of more scientific interest is that one  
285   sample was fully susceptible (no detectable HIV drug resistance mutation) despite having VF  
286   and substantial high HVL at the date of interview.

287

288

289

290

**Table 3. Characteristics of successfully genotyped samples (N=25)**

| SN | Sample ID | Age (years) | Duration on HAART (years) | HAART at date of interview | Viral Load at date of interview | NRTI mutations                                     | NNRTI Mutations                   | PI Mutations                             | HIV-1 Subtype |
|----|-----------|-------------|---------------------------|----------------------------|---------------------------------|----------------------------------------------------|-----------------------------------|------------------------------------------|---------------|
| 1  | K03       | 18          | 10                        | AZT+3TC+EFV                | 389,006                         | M184V, D67T, K70R, T215AITV, K219E                 | Y188L, K238T                      | None                                     | A1            |
| 2  | K11       | 55          | 6                         | ABC+3TC+LPVr               | 24,463                          | D67N, K70R, M184V, K219E, T215F                    | None                              | L10F, K20T, M46I, I47V, N88G             | C             |
| 3  | K12       | 29          | 6                         | AZT+3TC+EFV                | 20,805                          | M184V                                              | K103N, V108I, K238T               | None                                     | CRF 10_CD     |
| 4  | K15       | 49          | 12                        | AZT+3TC+NVP                | 81,123                          | None                                               | None                              | None                                     | A1            |
| 5  | K16       | 44          | 3                         | TDF+3TC+EFV                | 23,354                          | None                                               | K103N                             | None                                     | A1            |
| 6  | K17       | 15          | 7                         | AZT+3TC+NVP                | 25,879                          | None                                               | G190A                             | None                                     | A1            |
| 7  | K19       | 17          | 6                         | ABC+3TC+EFV                | 296,646                         | M41L, D67N, K70R, M184V, T215Y, K219Q, L74I, T69D  | A98G, K103N, P225H, F227F, 238T   | None                                     | C             |
| 8  | K21       | 20          | 13                        | ZVD+3TC+EFV                | 33,887                          | M184V, T215F                                       | K103N, Y188F, M230L               | None                                     | C             |
| 9  | K25       | 19          | 10                        | AZT+3TC+EFV                | 37,794                          | None                                               | V106M, G190A                      | None                                     | C             |
| 10 | K29       | 34          | 9                         | AZT+3TC+EFV                | 14,431                          | None                                               | K103S, V106M                      | None                                     | C             |
| 11 | K32       | 41          | 4                         | TDF+3TC+EFV                | 161,220                         | A62V, K65R, M184V, K219E                           | K101E, V106M, Y181C, G190A        | None                                     | C             |
| 12 | K36       | 29          | 10                        | AZT+3TC+EFV                | 23,056                          | M184V                                              | L100I, K103N                      | None                                     | A1            |
| 13 | K37       | 15          | 9                         | AZT+3TC+NVP                | 20,540                          | D67N, K70R, M184V, T215F, K219Q                    | A98G, K101E, G190A                | None                                     | C             |
| 14 | K38       | 46          | 13                        | ABC+3TC+ATVr               | 1,635,827                       | M41L, E44D, D67N, T69D, M184V, L210W, T215Y, K219R | K101E, E138K, Y181C, G190A, H221Y | L24I, L33F, M46I, I54V, Q58E, V82A, N88S | CRF 10_A1D    |
| 15 | M02       | 35          | 5                         | AZT+3TC+NVP                | 124,714                         | D67N, T69D, K70R, M184V                            | G190A                             | None                                     | D             |
| 16 | M03       | 69          | 9                         | AZT+3TC+NVP                | 36,600                          | M41L, E44A, M184V, L210W, T215Y, K219N             | Y181C, H221Y                      | None                                     | A1            |
| 17 | M05       | 53          | 10                        | AZT+3TC+NVP                | 65,638                          | D67G, K70R, M184V, T215FV, K219E                   | K103S, E138Q                      | None                                     | A1            |

|    |      |    |   |             |         |                                   |                              |      |    |
|----|------|----|---|-------------|---------|-----------------------------------|------------------------------|------|----|
| 18 | M07  | 52 | 4 | ABC+3TC+EFV | 66,486  | M184V                             | K103N                        | None | A1 |
| 19 | M10  | 41 | 8 | AZT+3TC+NVP | 45,819  | D67N, K70R,<br>M184V,K219Q        | K103N, V179L,<br>K238T       | None | A1 |
| 20 | MJ01 | 48 | 9 | AZT+3TC+EFV | 14,065  | M184V,L210W, T215Y                | K103N                        | None | C  |
| 21 | MJ03 | 36 | 9 | TDF+3TC+EFV | 176,378 | None                              | K103N                        | None | C  |
| 22 | MJ05 | 45 | 5 | TDF+FTC+EFV | 222,227 | None                              | L100I, K103N                 | None | C  |
| 23 | MJ06 | 51 | 4 | TDF+3TC+EFV | 14,711  | K70E, M184V                       | K103N,V108I,<br>H221Y, F227L | None | D  |
| 24 | P02  | 54 | 8 | AZT+3TC+EFV | 235,443 | None                              | V106M,V179D                  | None | C  |
| 25 | P03  | 45 | 5 | TDF+3TC+EFV | 128,781 | M41L, K70S, L74I, M184V,<br>T215Y | V106M,E138Q,<br>F227L        | None | C  |

291

292

293

294

295

296

297

298

299



## 300 **HIV-1 diversity in the RT and protease gene**

301 The HIV-1 diversity in the RT and protease genes is shown in Table 4. HIV-1 subtype  
302 C was the most prevalent subtype (48%) followed by A1 (36%), D (8%) and recombinants  
303 (8%). The recombinants identified were A1D and CD. All the recombinants were circulating  
304 recombinant forms (CRF).

305

**Table 4. HIV-1 diversity in RT and protease genes (N=25)**

| <b>Rega assignment</b> | <b>Number of sequences</b> | <b>Percentage</b> |
|------------------------|----------------------------|-------------------|
| HIV-1 Subtype C        | 12                         | 48                |
| HIV-1 Subtype A (A1)   | 9                          | 36                |
| HIV-1 Subtype D        | 2                          | 8                 |
| Recombinant of A1, D   | 1                          | 4                 |
| Recombinant of C, D    | 1                          | 4                 |
| <b>Total</b>           | <b>25</b>                  | <b>100</b>        |

306

307

## 308 **Predictors of virological failure**

309 The predictors of virological failure (VF) are shown in Table 5. In bivariate analysis,  
310 participant age, occupation, HAART initiated and HAART on use were significantly  
311 associated with virological failure. In the multivariable logistic regression analysis, only age  
312 remained to be independent predictor of VF. We found that, one unit increase in participant  
313 age (year) was associated with 6% lower odds of VF [aOR 0.94 (0.90-0.97)  $p < 0.001$ ].

314

315

316

317

**Table 5. Predictors of HIV virological failure (VF) (N=124)**

| Characteristic                                      | VF         |            | Crude analysis   |         | Multivariable analysis |         |
|-----------------------------------------------------|------------|------------|------------------|---------|------------------------|---------|
|                                                     | No (%)     | Yes (%)    | cOR (95% CI)     | p-value | aOR (95% CI)           | p-value |
| <b>Age (years)*</b>                                 | 48 [43-54] | 41 [21-49] | 0.93 (0.90-0.96) | <0.001  | 0.94 (0.90-0.97)       | 0.001   |
| <b>Sex</b>                                          |            |            |                  |         |                        |         |
| <b>Male</b>                                         | 16 (26.2)  | 26 (41.3)  | 1                |         | 1                      |         |
| <b>Female</b>                                       | 45 (73.8)  | 37 (58.7)  | 0.51 (0.24-1.08) | 0.079   | 0.56 (0.21-1.51)       | 0.254   |
| <b>Marital status</b>                               |            |            |                  |         |                        |         |
| <b>Married</b>                                      | 22 (36.1)  | 18 (28.6)  | 0.71 (0.33-1.51) | 0.373   | -                      | -       |
| <b>Single</b>                                       | 39(63.9)   | 45 (71.4)  | 1                |         |                        |         |
| <b>Occupation</b>                                   |            |            |                  |         |                        |         |
| <b>Employed</b>                                     | 53 (86.9)  | 36 (57.1)  | 0.2 (0.08-0.49)  | <0.001  | 0.35 (0.12-1.04)       | 0.059   |
| <b>Unemploye</b>                                    | 8 (13.1)   | 27 (42.9)  | 1                |         | 1                      |         |
| <b>d</b>                                            |            |            |                  |         |                        |         |
| <b>Duration of ART intake (months)</b>              |            |            |                  |         |                        |         |
| <b>12 - 36</b>                                      | 13 (21.3)  | 7 (11.1)   | 1                |         |                        |         |
| <b>&gt;36</b>                                       | 48 (78.7)  | 56 (88.9)  | 2.17 (0.80-5.87) | 0.128   | -                      | -       |
| <b>Switched ART</b>                                 |            |            |                  |         |                        |         |
| <b>Yes</b>                                          | 24 (39.3)  | 30 (47.6)  | 1.4 (0.69-2.86)  | 0.353   | 0.89 (0.31-2.53)       | 0.827   |
| <b>No</b>                                           | 37 (60.7)  | 33 (52.4)  | 1                |         | 1                      |         |
| <b>HAART initiated</b>                              |            |            |                  |         |                        |         |
| <b>TDF based</b>                                    | 27 (44.3)  | 12 (19)    | 0.3 (0.13-0.66)  | 0.003   | 0.26 (0.05-1.27)       | 0.096   |
| <b>Non-TDF</b>                                      | 34 (55.7)  | 51 (81)    | 1                |         | 1                      |         |
| <b>HAART on use</b>                                 |            |            |                  |         |                        |         |
| <b>TDF based</b>                                    | 37 (60.7)  | 22 (34.9)  | 0.35 (0.17-0.72) | 0.005   | 0.85 (0.25-2.85)       | 0.795   |
| <b>Non-TDF</b>                                      | 24 (39.3)  | 41 (65.1)  | 1                |         | 1                      |         |
| <b>Baseline CD4 count (cells/<math>\mu</math>L)</b> |            |            |                  |         |                        |         |
| <b>&lt;100</b>                                      | 20 (32.8)  | 17 (27)    | 0.76 (0.35-1.64) | 0.481   | 0.86 (0.35-2.11)       | 0.745   |
| <b><math>\geq</math>100</b>                         | 41 (67.2)  | 46 (73)    | 1                |         | 1                      |         |
| <b>WHO clinical stage at interview</b>              |            |            |                  |         |                        |         |
| <b>I/II</b>                                         | 32 (52.5)  | 26 (41.3)  | 1                |         | 1                      |         |
| <b>III/IV</b>                                       | 29 (47.5)  | 37 (58.7)  | 1.57 (0.77-3.19) | 0.213   | 1.04 (0.44-2.46)       | 0.931   |

318 \* Median age [IQR] ; cOR: Crude odds ratio; aOR: Adjusted odds ratio

319

## 320 Discussion

321 The present study aimed at determining acquired HIV drug resistance mutations  
322 (HIVDRMs) and predictors of VF in HIV-infected individuals failing to respond to first-line  
323 ART in Moshi municipality, northern Tanzania. High profiles of HIVDRMs conferring  
324 acquired HIV drug resistance to NRTIs, NNRTIs and PIs were found. Age was a significant  
325 factor associated with VF.

326 In the present study, most (96%) of the successfully sequenced samples had at least  
327 one major mutation conferring resistance to HIV drugs. NNRTI resistance mutations profiles  
328 (92%) were at the lead compared to NRTIs resistance mutation profiles (68%) consistently  
329 with findings elsewhere [6]. The most frequent NNRTI mutations were K103N, V106M, and  
330 G190A and they are implicated to confer high level resistance to efavirenz and nevirapine  
331 [14]. NNRTIs were previously reported to have low genetic barrier and hence highly  
332 vulnerable to resistance [15]. These findings further support the Tanzanian programmatic  
333 intervention to replace efavirenz with dolutegravir which has proven to have high genetic  
334 barrier to resistance [16]. This study further reports frequent NRTI mutations as M184V,  
335 K70R, and D67N in line with other studies [10]. M184V associates with high level resistance  
336 to abacavir, emtricitabine, and lamivudine; while K70R and D67N are among thymidine  
337 analogue-associated resistance mutations (TAM). More than a half of sequenced samples had  
338 at least one TAM. Existence of TAMs reduce the susceptibility of all available NRTIs with  
339 an exception of emtricitabine and lamivudine [17].

340 In addition, this study reports co-existence of T69D mutation with at least one TAM  
341 in three samples, two of these samples had M41L and T215Y TAMs, a combination which  
342 further fuel cross-resistance to all US FDA approved NRTIs, a phenomenon known as Multi-  
343 NRTI resistance [14,18]. This means that the Tanzanian AIDS control program is at risk of  
344 remaining with fewer options of main-stream HIV drugs both in first and second-line  
345 regimens. Presence of T69 insertions along with TAMs in northern Tanzania further  
346 advocates the need for implementation of HIV drug resistance testing and monitoring before  
347 and after switching HAART. Continuous programmatic monitoring of HIV drug resistance in  
348 HIV-infected individuals failing to respond to first-line HIV drugs will preserve the integrity  
349 of few NRTI options in second-line. However there is a need to consider deployment of  
350 NRTIs with substantial genetic barrier to resistance.

351 In the other hand, this study describes full genotypic susceptibility of prescribed  
352 HAART to a 49 years old individual with ID K15, on ART for 12 years and with HIV plasma  
353 viral load 81,123 copies/ml. At the interview, he reported good adherence to the prescribed  
354 HAART. This may be explained by presence of HIV drug resistance mutations away from  
355 the *pol* gene and hence necessitating the need for sequencing the whole viral genome in this  
356 sample.

357 A significant association between age and VF concurs with findings from Cameroon  
358 [19], Senegal [20], Ethiopia [21], Swaziland [22], Kenya [23,24], Rwanda [25] and Uganda  
359 [26]. HIV infected adolescent and young adults on HAART were previously reported to have  
360 inconsistency in adhering to antiretroviral medication due to anxiety, depression,  
361 forgetfulness, fear of disclosure, ART adverse events and abandoning medication when they  
362 feel better [27], the consequences which contributes to VF. Therefore, special care and  
363 treatment to the adolescent and young adults is of paramount with emphasis on health  
364 education regarding the importance of disclosure and adhering to medications. In addition,  
365 assessment and treatment of cognitive and mental health problems is also needed.

366 Although not statistically significant, this study reports the association between  
367 advancement of WHO clinical stage of AIDS and VF, a finding which was consistent with  
368 those reported by Jobanputra et al in (2015). Virological failure in individuals with advanced  
369 HIV/AIDS can be explained by the severe state of immunodeficiency which attracts  
370 opportunistic infections (OIs) and replicative fitness of HIV [28]. Early diagnosis of HIV,  
371 effective treatment and monitoring of HIV/AIDS and related OIs to patients on HAART is  
372 highly recommended [9].

373 Tenofovir (TDF) based combination antiretroviral therapy is one of the recommended  
374 first-line antiretroviral of choice to the adolescents and adults living with HIV worldwide [9]

375 as well as in Tanzania [8]. Although not statistically significant, being on tenofovir based  
376 first-line HAART was protective against VF, this was consistent with studies previously done  
377 in the north America [29], Thailand [30] and in the systematic review [31]. On top of that,  
378 TDF based regimens were extensively reported in previous randomized clinical trials to be  
379 more effective than other combination therapies in bringing favourable virological and  
380 immunologic outcomes [32,33]. The possible explanation of this fact is that, compared to  
381 other back-borne antiretroviral, TDF based therapy is consumed once daily with minimal  
382 treatment related toxicity [32,34], more tolerable [35] and can be easily adhered by PLHIV  
383 [36]. Therefore we complement the prescription of TDF based HAART in PLHIV initiating  
384 HAART as the strategy of reducing VF.

## 385 **Limitations of the study**

386 One of the limitations of this study is to rely on self-reporting of adherence to  
387 HAART and pill counting at the clinic visit. It is certain that some of the study participants  
388 might have provided imprecise information about adherence. However, this was the common  
389 practice prescribed under the Tanzanian HIV and AIDS treatment and management guideline  
390 of October 2017. In addition, recall biases are certain to some of the information requested  
391 from the VS group, for example it was difficult to report when was the last day to miss taking  
392 pills.

393 Finally, the profiles of HIVDRMs should not be generalized as some of the samples  
394 were not sequenced due to financial meltdowns. However, compared to the data in this study,  
395 similar high proportions of HIVDRMs are anticipated in the samples yet to be sequenced.

396

397

398

## 399 **Conclusion**

400           There is high rate of HIVDRMs in HIV-infected individuals failing to respond to  
401 first-line HAART in northern Tanzania. This happens when there is no programmatic  
402 monitoring of HIV drug resistance in individuals with VF. Prompt intervention are required  
403 to safeguard the limited number of second-line HIV drug options, one of them is  
404 implementation of HIV drug resistance monitoring before and after switching HAART. In  
405 addition, consideration to deploy HIV drugs with higher genetic barrier is of importance.

406

## 407 **Acknowledgements**

408           The authors are thankful for the permission given by Kilimanjaro Regional  
409 Administrative Secretary to conduct research in Mawenzi Regional Referral Hospital, Pasua  
410 and Majengo Health Centres. Also many thanks should go to the executive director of  
411 Kilimanjaro Christian Medical Centre for allowing us to conduct research in the  
412 CTC/CCFCC. The authors are really grateful to the study participants who  
413 consented/assented to take part in this study as well as the technical and clinical staffs from  
414 Kilimanjaro Christian Medical Centre, Kilimanjaro Clinical Research Institute, Mawenzi  
415 Regional Referral Hospital, Pasua and Majengo Health Centre for their support. Extensive  
416 gratitude should go to KCRI-Biotechnology research laboratory staff, particularly to Mr.  
417 William K. Faustine for their cooperation and technical support during the conduction of this  
418 research. Special thanks should go to Professor John Bartlett for critical review of the  
419 manuscript. Finally the authors would like to appreciate the HIV Genotyping Facility in  
420 Temeke Specialized Laboratory at Temeke Regional Referral Hospital under the  
421 Management and Development for Health (MDH, Temeke, Dar es Salaam) for hosting the  
422 wet laboratory procedures.

## 423 **References**

- 424 1. UNAIDS. UNAIDS Data 2019. Geneva; 2019. Available:  
425 [https://www.unaids.org/sites/default/files/media\\_asset/2019-UNAIDS-  
426 data\\_en.pdf%0Aaidsinfo.unaids.org](https://www.unaids.org/sites/default/files/media_asset/2019-UNAIDS-<br/>426 data_en.pdf%0Aaidsinfo.unaids.org).
- 427 2. Lifson AR, Grund B, Gardner EM, Kaplan R, Denning E, Engen N, et al. Improved  
428 quality of life with immediate versus deferred initiation of antiretroviral therapy in  
429 early asymptomatic HIV infection. *AIDS*. Lippincott Williams and Wilkins; 2017. pp.  
430 953–963. doi:10.1097/QAD.0000000000001417
- 431 3. UNAIDS. Political declaration on HIV and AIDS: On the fast-track to accelerate the  
432 fight against HIV and to end the AIDS epidemic by 2030. United Nations General  
433 Assembly. Geneva; 2016.
- 434 4. WHO. HIV drug resistance report 2019. Geneva, Switzerland: World Health  
435 Organization; 2019 (WHO/CDS/HIV/19.21); 2019. Available:  
436 <https://www.who.int/hiv/pub/drugresistance/hivdr-report-2019/en/>
- 437 5. Boender TS, Kityo CM, Boerma RS, Hamers RL, Ondoa P, Wellington M, et al.  
438 Accumulation of HIV-1 drug resistance after continued virological failure on first-line  
439 ART in adults and children in sub-Saharan Africa. *J Antimicrob Chemother*. 2016;71.  
440 doi:10.1093/jac/dkw218
- 441 6. Tenores S group. Global epidemiology of drug resistance after failure of WHO  
442 recommended first-line regimens for adult HIV-1 infection : a multicentre  
443 retrospective cohort study. *Lancet Infect Dis*. 2016;16: 565–575. doi:10.1016/S1473-  
444 3099(15)00536-8
- 445 7. NACP. National guidelines for the management of HIV and AIDS. Dar es Salaam,  
446 Tanzania: National AIDS Control Program, Ministry of health, Community  
447 Development, Gender, Elderly and Children; 2019.

- 448 8. NACP. National guidelines for the management of HIV and AIDS. 6th ed. Dar es  
449 Salaam, Tanzania: Ministry of health, community development, gender, elderly and  
450 the children; 2017.
- 451 9. WHO. Consolidated guidelines on the use of antiretroviral drugs for treating and  
452 preventing hiv infection: Recommendations for a public health approach. Geneva:  
453 World Health Organisation: Geneva; 2016.
- 454 10. Barabona G, Mahiti M, Masoud S, Mbebele P, Mgunya AS, Minja L, et al. Pre-  
455 treatment and acquired HIV drug resistance in Dar es Salaam, Tanzania in the era of  
456 tenofovir and routine viral load monitoring. *J Antimicrob Chemother.* 2019.  
457 doi:10.1093/jac/dkz272
- 458 11. Hawkins C, Ulenga N, Liu E, Aboud S, Mugusi F, Chalamilla G, et al. HIV virological  
459 failure and drug resistance in a cohort of Tanzanian HIV-infected adults. *J Antimicrob*  
460 *Chemother.* 2016;71: 1966–1974. doi:10.1093/jac/dkw051
- 461 12. Masimba P, Kituma E, Klimkait T, Horvath E, Stoeckle M, Hatz C, et al. Prevalence  
462 of drug resistance mutations and HIV type 1 subtypes in an HIV Type 1-infected  
463 cohort in rural Tanzania. *AIDS Res Hum Retroviruses.* 2013;29.  
464 doi:10.1089/aid.2011.0367
- 465 13. Charan J, Biswas T. How to calculate sample size for different study designs in  
466 medical research? *Indian J Psychol Med.* 2013;35: 121. doi:10.4103/0253-  
467 7176.116232
- 468 14. Wensing AM, Calvez V, Ceccherini-Silberstein F, Charpentier C, Günthard HF,  
469 Paredes R, et al. 2019 update of the drug resistance mutations in HIV-1. *Top Antivir*  
470 *Med.* 2019;27: 111–121.
- 471 15. Clutter DS, Jordan MR, Bertagnolio S, Shafer RW. HIV-1 drug resistance and  
472 resistance testing. *Infect Genet Evol.* 2016;46: 292–307.



- 473 doi:10.1016/j.meegid.2016.08.031
- 474 16. Castagna A, Maggiolo F, Penco G, Wright D, Mills A, Grossberg R, et al.  
475 Dolutegravir in Antiretroviral-Experienced Patients With Raltegravir- and/or  
476 Elvitegravir-Resistant HIV-1: 24-Week Results of the Phase III VIKING-3 Study. *JID*.  
477 2014;210: 354–362. Available: <https://academic.oup.com/jid/article/210/3/354/828280>
- 478 17. Whitcomb JM, Parkin NT, Chappey C, Hellmann NS, Petropoulos CJ. Broad  
479 nucleoside reverse-transcriptase inhibitor cross-resistance in human immunodeficiency  
480 virus type 1 clinical isolates. *J Infect Dis*. 2003;188: 992–1000. doi:10.1086/378281
- 481 18. Miller MD, Margot N, Lu B, Zhong L, Chen S, Cheng A, et al. Genotypic and  
482 Phenotypic Predictors of the Magnitude of Response to Tenofovir Disoproxil Fumarate  
483 Treatment in Antiretroviral-Experienced Patients. *J Infect Dis*. 2004;189: 837–846.  
484 doi:10.1086/381784
- 485 19. Meriki HD, Tufon KA, Afegenwi MH, Nyindem BA, Atanga PN, Anong DN, et al.  
486 Immuno-haematologic and virologic responses and predictors of virologic failure in  
487 HIV-1 infected adults on first-line antiretroviral therapy in Cameroon. *Infect Dis*  
488 *poverty*. 2014;3.
- 489 20. De Beaudrap P, Thiam M, Diouf A, Toure-Kane C, Ngom-Guèye NF, Vidal N, et al.  
490 Risk of virological failure and drug resistance during first and second-line  
491 antiretroviral therapy in a 10-year cohort in senegal: Results from the ANRS 1215  
492 cohort. *J Acquir Immune Defic Syndr*. 2013;62: 381–387.  
493 doi:10.1097/QAI.0b013e31827a2a7a
- 494 21. Bayu B, Tariku A, Bulti AB, Habitu YA, Derso T, Teshome DF. Determinants of  
495 virological failure among patients on highly active antiretroviral therapy in University  
496 of Gondar Referral Hospital, Northwest Ethiopia: a case – control study. *HIV/AIDS -*  
497 *Res Palliat care*. 2017;9: 153–159.

- 498 22. Jobanputra K, Parker LA, Azih C, Okello V, Maphalala G, Kershberger B, et al.  
499 Factors associated with virological failure and suppression after enhanced adherence  
500 counselling , in children , adolescents and adults on antiretroviral therapy for HIV in  
501 Swaziland. PLoS One. 2015;10: e0116144. doi:10.1371/journal.pone.0116144
- 502 23. Hassan AS, Nabwera HM, Mwaringa SM, Obonyo CA, Sanders EJ, Rinke de Wit TF,  
503 et al. HIV-1 virologic failure and acquired drug resistance among first-line  
504 antiretroviral experienced adults at a rural HIV clinic in coastal Kenya: a cross-  
505 sectional study. AIDS Res Ther. 2014;11. doi:10.1186/1742-6405-11-9
- 506 24. Sang RKA, Miruka FO. Factors associated with virologic failure amongst adults on  
507 antiretroviral therapy in Nyanza region, Kenya. IOSR J Dent Med Sci. 2016;15: 108–  
508 121. doi:10.9790/0853-15076108121
- 509 25. Ndahimana J d. A, Riedel DJ, Mwumvaneza M, Sebuho D, Uwimbabazi JC,  
510 Kubwimana M, et al. Drug resistance mutations after the first 12 months on  
511 antiretroviral therapy and determinants of virological failure in Rwanda. Trop Med Int  
512 Heal. 2016;21. doi:10.1111/tmi.12717
- 513 26. Bulage L, Ssewanyana I, Nankabirwa V, Nsubuga F, Kihembo C, Pande G, et al.  
514 Factors associated with virological non-suppression among HIV-positive patients on  
515 antiretroviral therapy in Uganda, August 2014-July 2015. BMC Infect Dis. 2017;17.  
516 doi:10.1186/s12879-017-2428-3
- 517 27. Dowshen N, D'Angelo L. Health care transition for youth living with HIV/AIDS.  
518 Pediatrics. 2011;128: 762–771. doi:10.1542/peds.2011-0068
- 519 28. Shors T. Understanding Viruses. Third edit. Burlington, Massachusetts: Jones and  
520 Bartlett Publishers; 2017.
- 521 29. Havlir D V., Koelsch KK, Strain MC, Margot N, Lu B, Ignacio CC, et al. Predictors of  
522 residual viremia in HIV-infected patients successfully treated with efavirenz and

- 523 lamivudine plus either tenofovir or stavudine. *J Infect Dis.* 2005;191: 1164–1168.  
524 doi:10.1086/428588
- 525 30. Avihingsanon A, Maek-a-nantawat W, Gatechompol S, Sapsirisavat V,  
526 Thiansanguankul W, Sophonphan J, et al. Efficacy and safety of a once-daily single-  
527 tablet regimen of tenofovir, lamivudine, and efavirenz assessed at 144 weeks among  
528 antiretroviral-naïve and experienced HIV-1-infected Thai adults. *Int J Infect Dis.*  
529 2017;61: 89–96. doi:10.1016/J.IJID.2017.06.009
- 530 31. Bartlett JA, Chen S-S, Quinn JB. Comparative efficacy of nucleoside/nucleotide  
531 reverse transcriptase inhibitors in combination with efavirenz: results of a systematic  
532 overview. *HIV Clin Trials.* 2007;8: 221–226. doi:10.1310/hct0804-221
- 533 32. Gallant JE, Staszewski S, Pozniak AL, DeJesus E, Suleiman JMAH, Miller MD, et al.  
534 Efficacy and safety of tenofovir df vs stavudine in combination therapy in  
535 antiretroviral-naïve patients: a 3-year randomized trial. *Jama.* 2004;292: 191–201.  
536 doi:10.1001/jama.292.2.191
- 537 33. Pozniak AL, Gallant JE, DeJesus E, Arribas JR, Gazzard B, Campo RE, et al.  
538 Tenofovir disoproxil fumarate, emtricitabine, and efavirenz versus fixed-dose  
539 zidovudine/lamivudine and efavirenz in antiretroviral-naïve patients: Virologic,  
540 immunologic, and morphologic changes --a 96-week analysis. *J Acquir Immune Defic*  
541 *Syndr.* 2006;43: 535–540. doi:10.1097/01.qai.0000245886.51262.67
- 542 34. Velen K, Lewis JJ, Charalambous S, Grant AD, Churchyard GJ, Hoffmann CJ.  
543 Comparison of tenofovir, zidovudine, or stavudine as part of first-line antiretroviral  
544 therapy in a resource-limited-setting: a cohort study. *PLoS One.* 2013;8: e64459.  
545 doi:10.1371/journal.pone.0064459
- 546 35. Kefale AT, Dadi TL, Biru TT, Mega TA. Treatment outcome and adverse events of  
547 tenofovir disoproxil fumarate based regimens as compared to zidovudine based

548 regimens among among people living with HIV/AIDS : a systematic review and meta-  
549 analysis of observational studies. Open AIDS J. 2018;12: 38–52.  
550 doi:10.2174/1874613601812010038

551 36. WHO. Antiretroviral therapy for HIV infection in adults and adolescents:  
552 Recommendations for a public health approach. 2010 revision. World Heal Organ.  
553 Geneva: Switzerland; 2010. doi:10.1017/CBO9781107415324.004

554

555 S1 Dataset. Demographic and clinical data

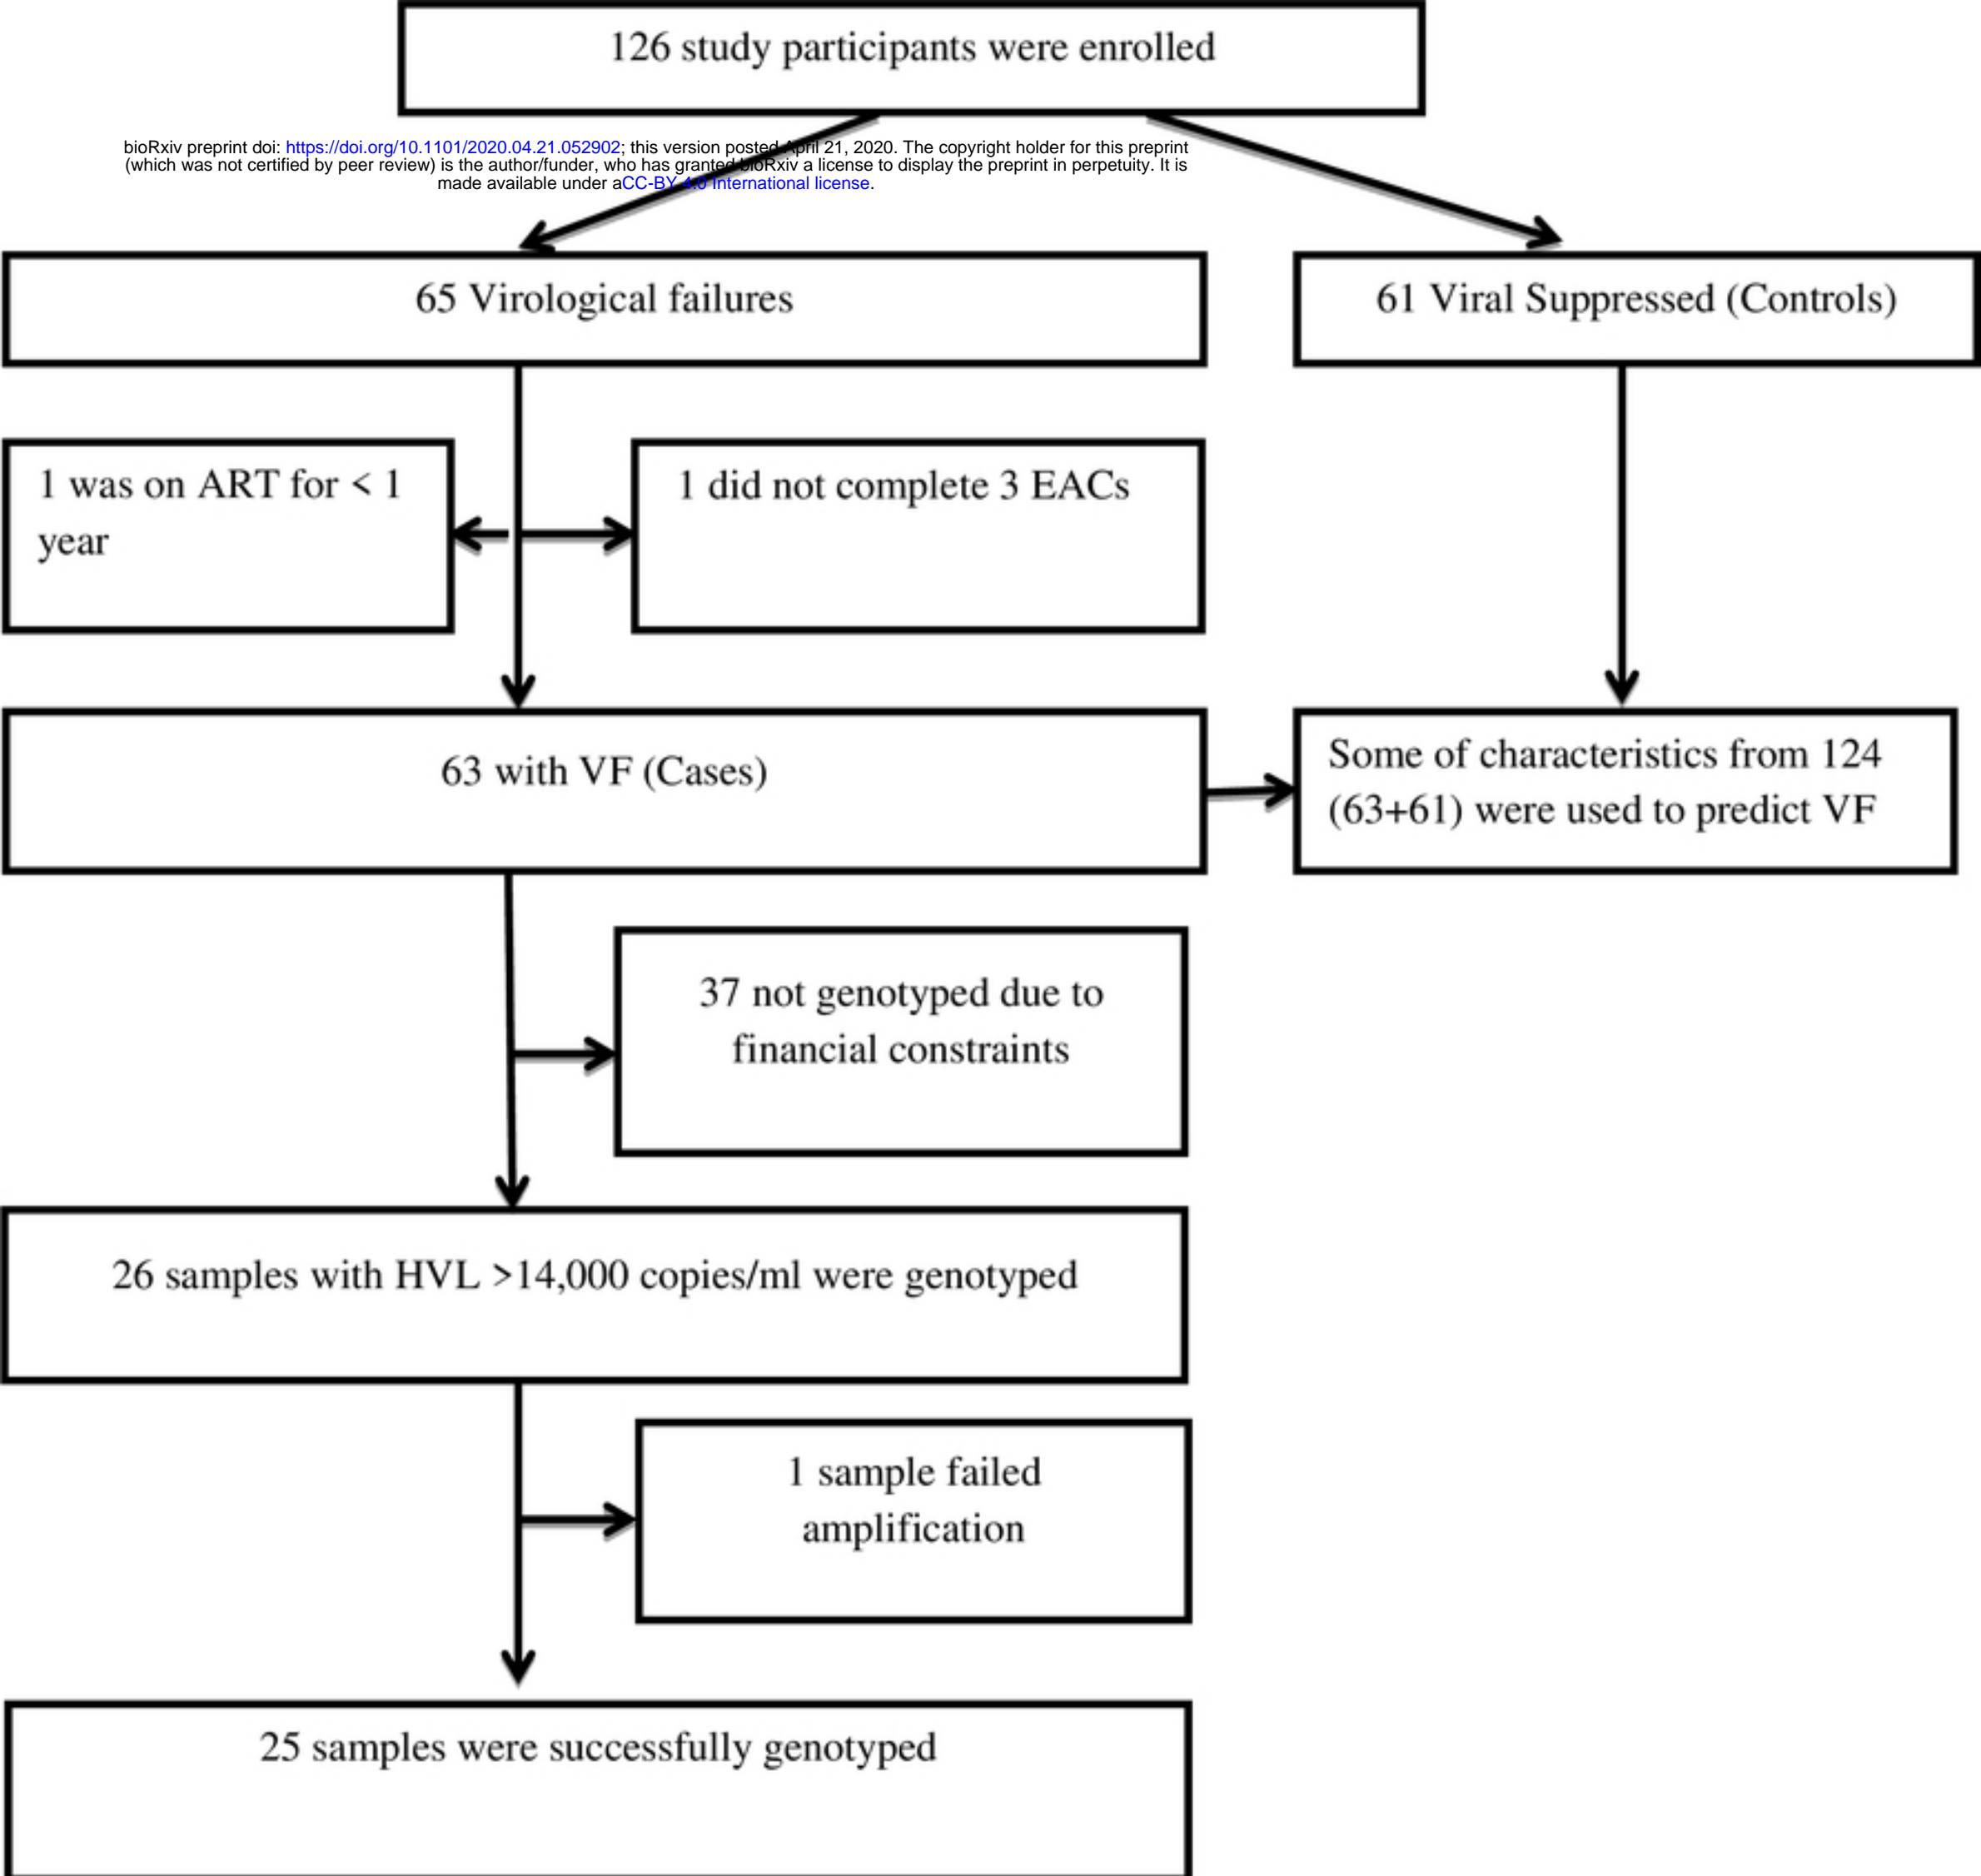

bioRxiv preprint doi: <https://doi.org/10.1101/2020.04.21.052902>; this version posted April 21, 2020. The copyright holder for this preprint (which was not certified by peer review) is the author/funder, who has granted bioRxiv a license to display the preprint in perpetuity. It is made available under aCC-BY 4.0 International license.

Figure

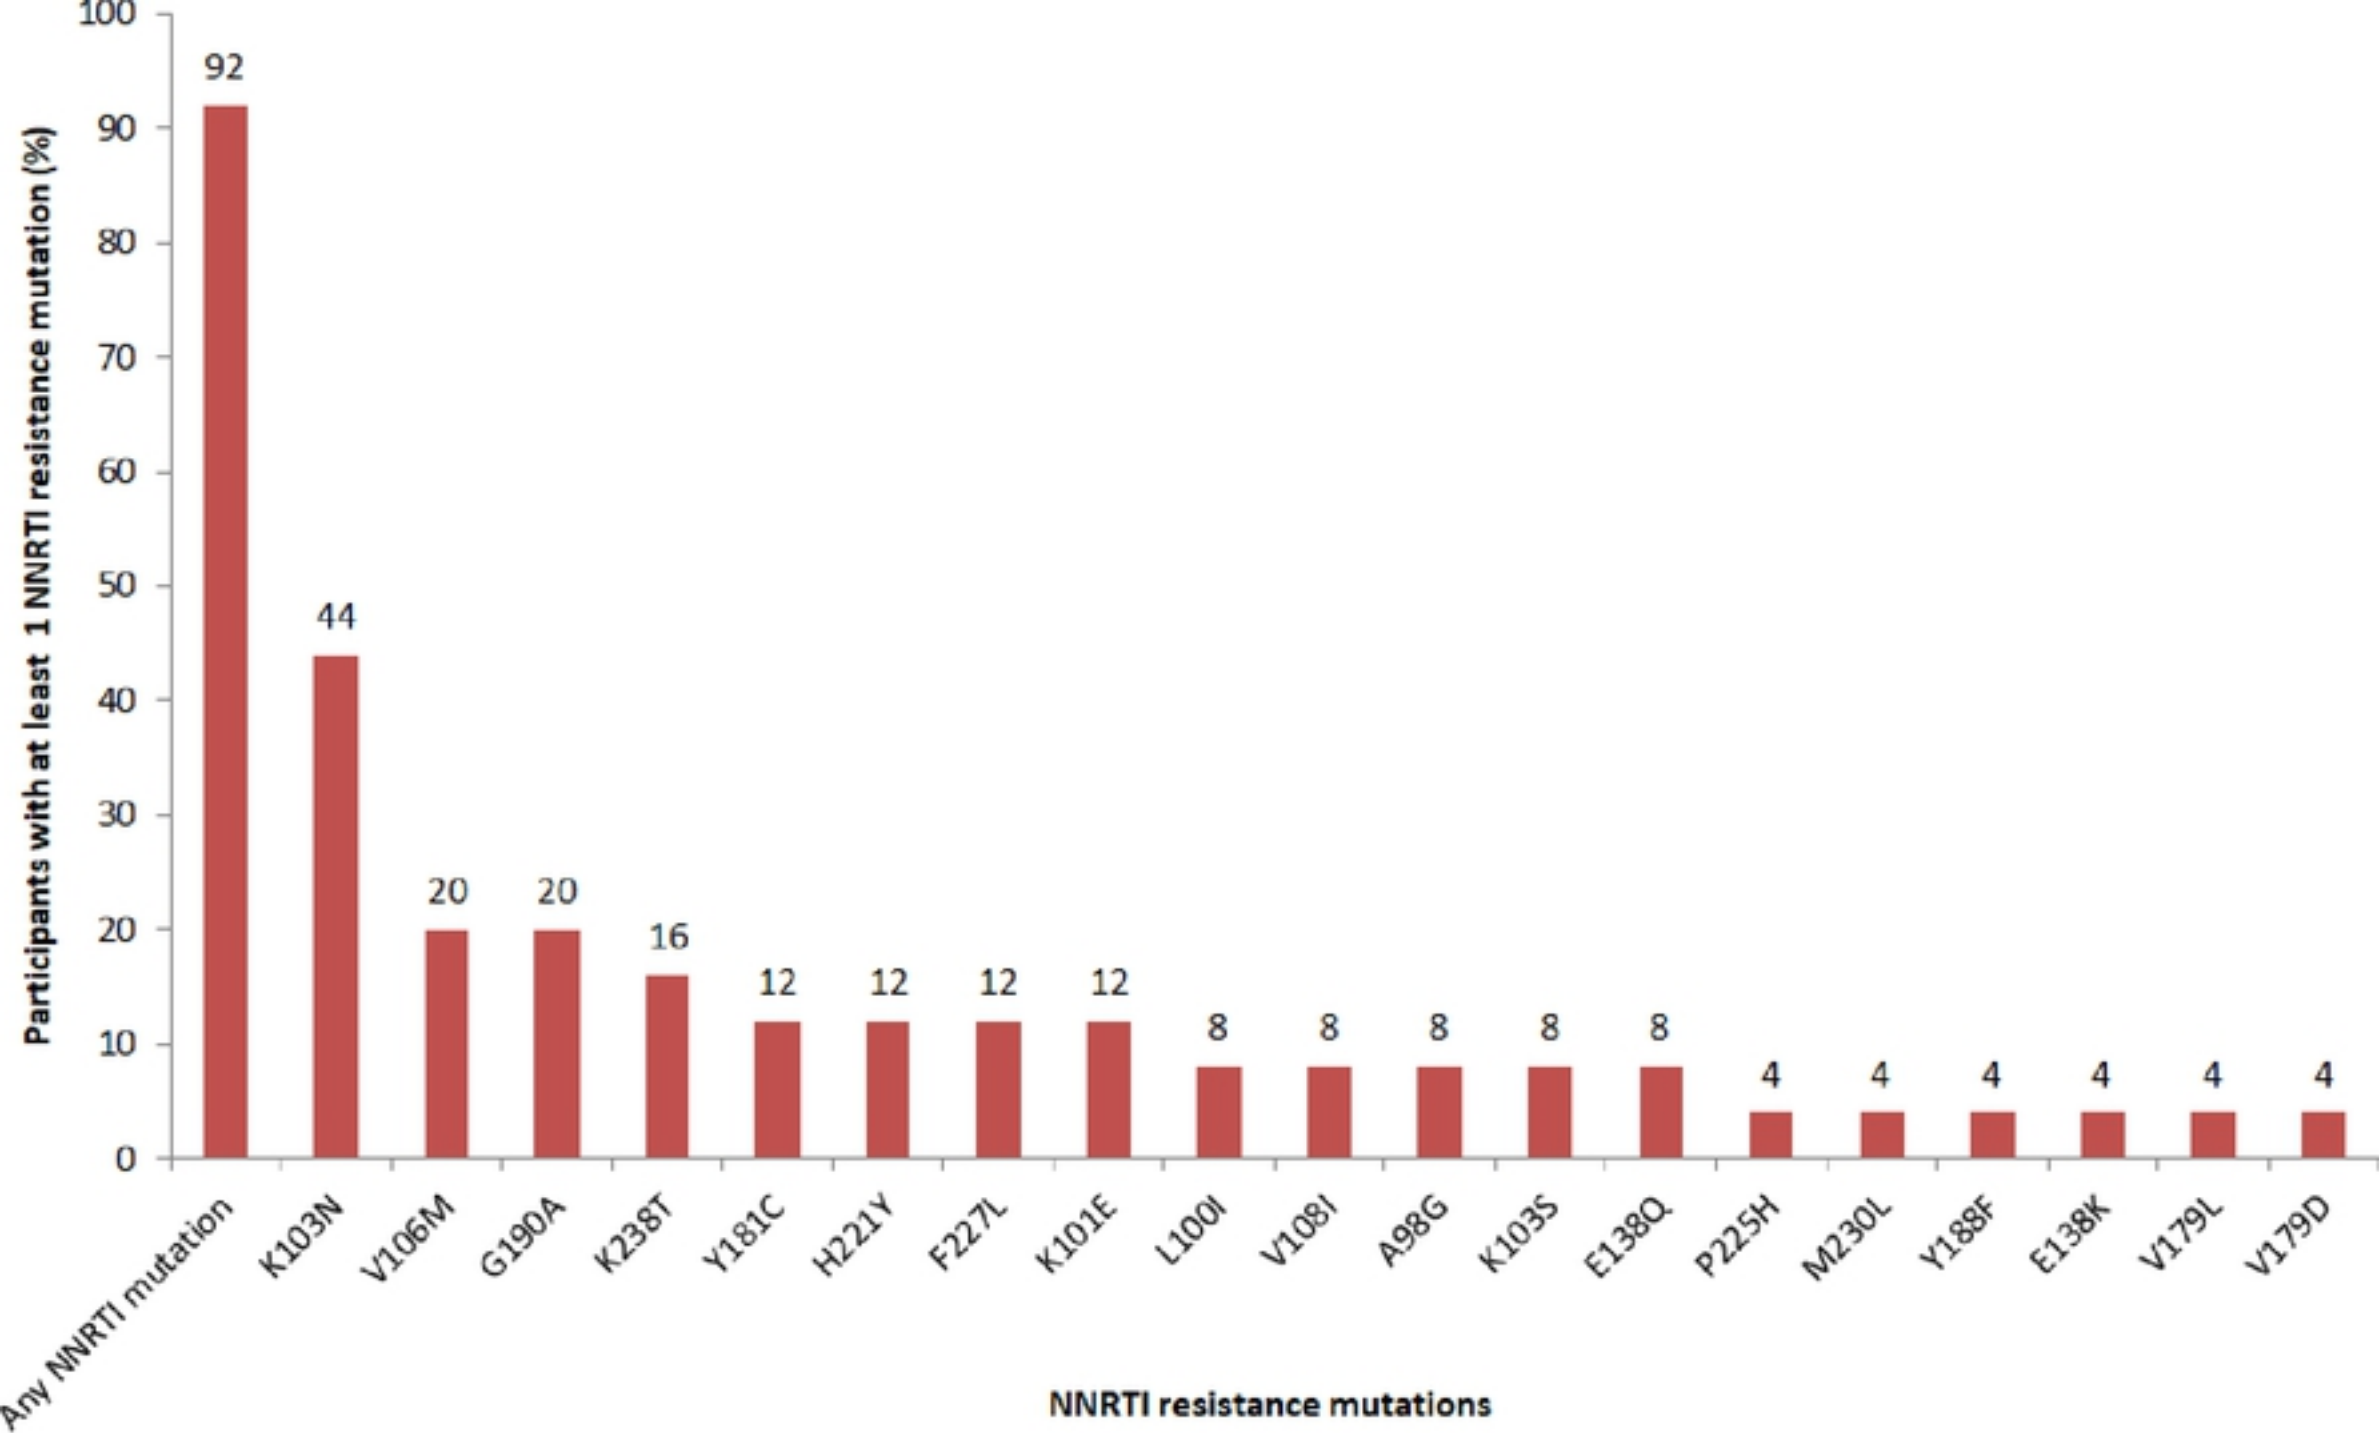

Figure

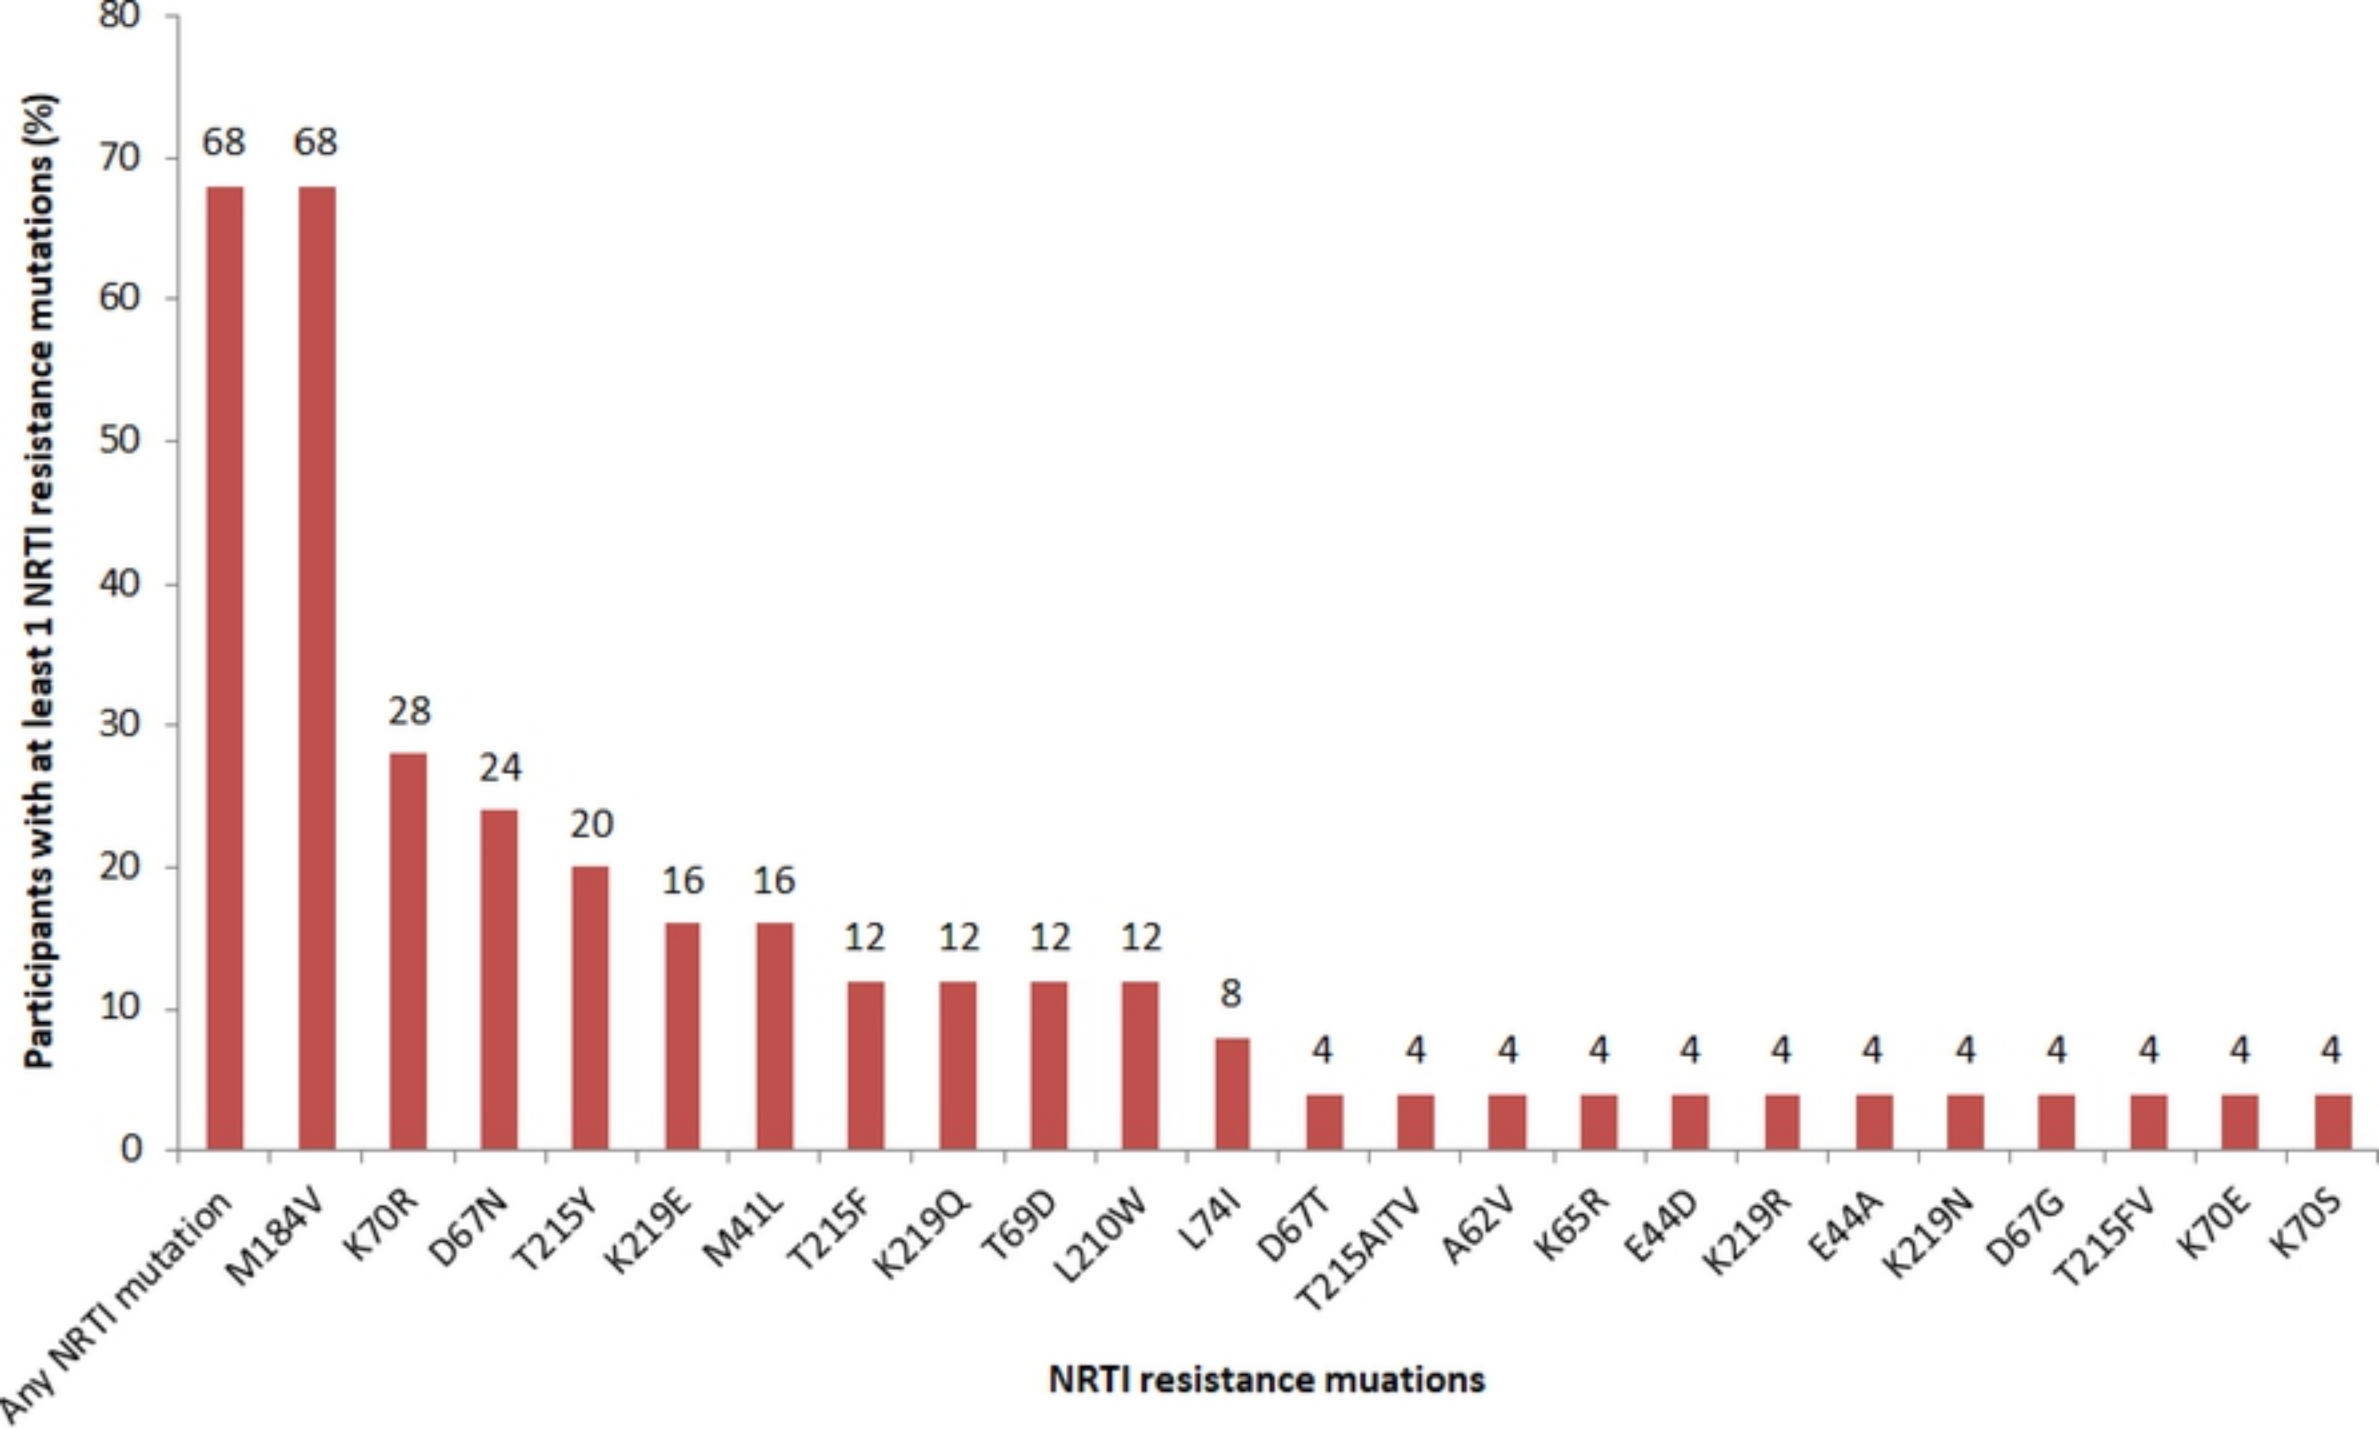

Figure
